# Supplementary material
Source: PubMed Central journal article supplement (PMC11131444)
Supplement: 18_2008_8547_MOESM1_ESM.pdf [file 18_2008_8547_MOESM1_ESM.pdf]

## Electronic supplementary material

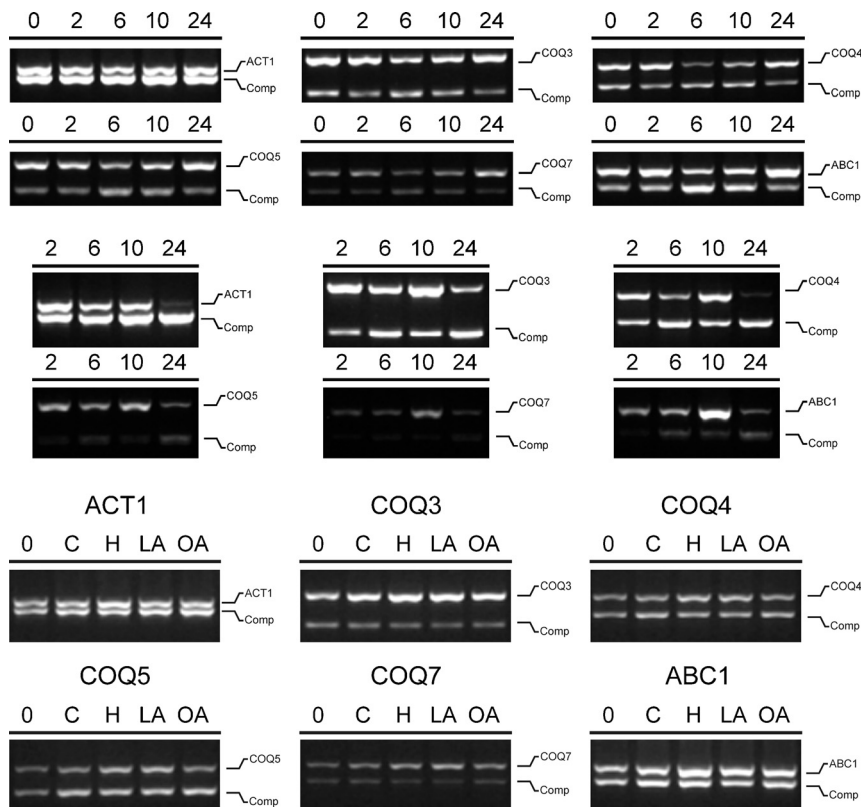

**Figure S1.** See Figure 4 and 5 legend of the manuscript.

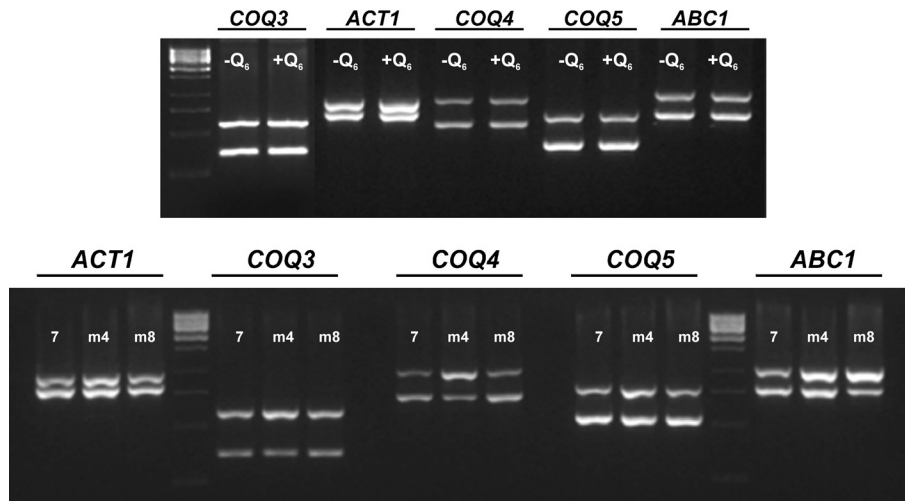

**Figure S2.** See Figure 7 and 8 legend of the manuscript.

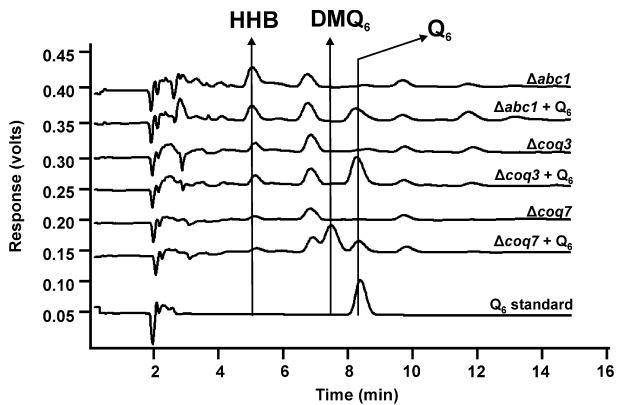

**Figure S3.** Quinone content in *coq7* null yeast mutants cultured in the presence of exogenously added Q<sub>6</sub>. Yeast strain *coq3*, *coq7*, or *abc1/coq8* null mutants were cultured in YPD. Where indicated, media was also supplemented with 2  $\mu$ M Q<sub>6</sub>. Cells were collected and subjected to lipid extraction and separation by RP-HPLC coupled to an electrochemical detector (ECD) in order to detect quinones (coenzyme Q<sub>6</sub>) or intermediates (DMQ<sub>6</sub> and HHB) as was indicated in the arrows. Data showed correspond to a representative experiment of a set of two.

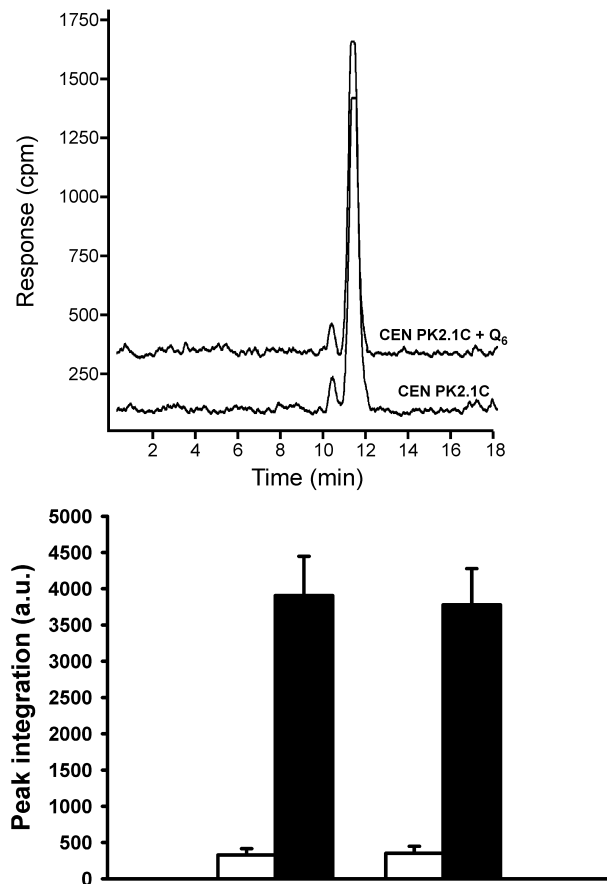

**Figure S4.** Wild type strain CEN.PK2-1C is non-affected after the growth in presence of exogenous coenzyme Q<sub>6</sub>. (A) The strain was cultured in YPD in presence of [*U*-<sup>14</sup>C] *p*-hydroxybenzoic acid. Where indicated, media was also supplemented with 2 μM Q<sub>6</sub>. Cells were collected and subjected to lipid extraction and separation by RP-HPLC coupled to a radiometric detector in order to detect <sup>14</sup>C-Q<sub>6</sub> and <sup>14</sup>C-Q<sub>6</sub>-intermediates. Shown data correspond to a representative experiment of a set of two. (B) Quantification of quinone peaks. Data correspond to two independent experiments (different cultures and lipid extractions) injected three times in the RP-HPLC system. Black bars Q<sub>6</sub>; white bars DMQ<sub>6</sub>. Data are expressed as the average of three determinations ± SD as arbitrary units obtained after the integration of peaks. As background level was used 50 cpm.
